# Supplementary material for: Changes in Soil Organic Carbon Fractions and Fungal Communities, Subsequent to Different Management Practices in Moso Bamboo Plantations
Source: MDPI journal article supplement (doi:10.3390/jof8060640), 2022-06-16
Supplement: s1 [file s1]

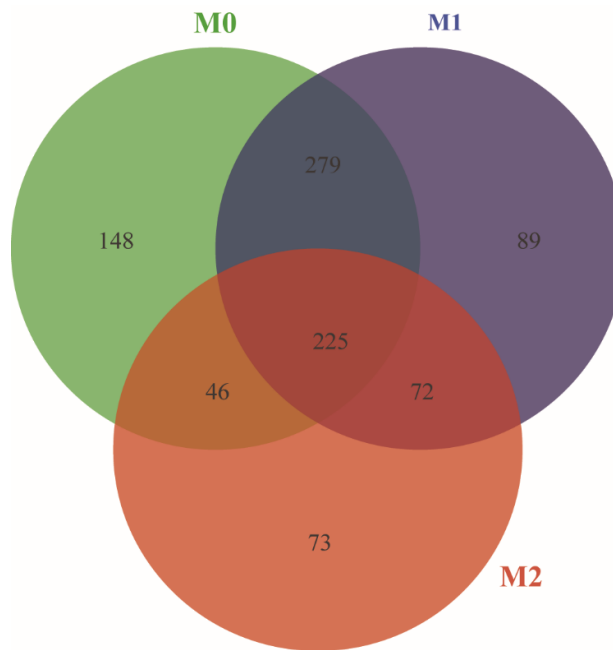

**Figure S1.** Venn diagrams of soil fungal OTUs. M0, M1, and M2 indicated undisturbed, extensively managed, and intensively managed bamboo stands, respectively

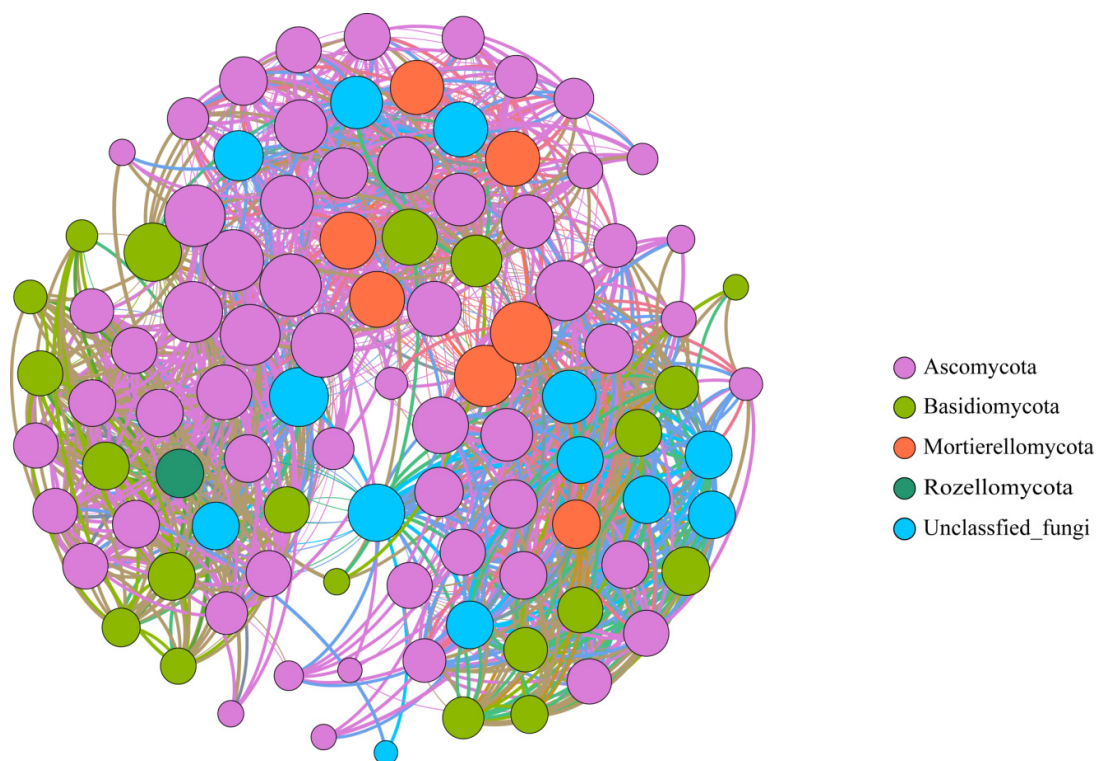

**Figure S2.** Co-occurrence networks of fungal communities at OTU level colored by phylum in the Moso bamboo plantations under different management practices.

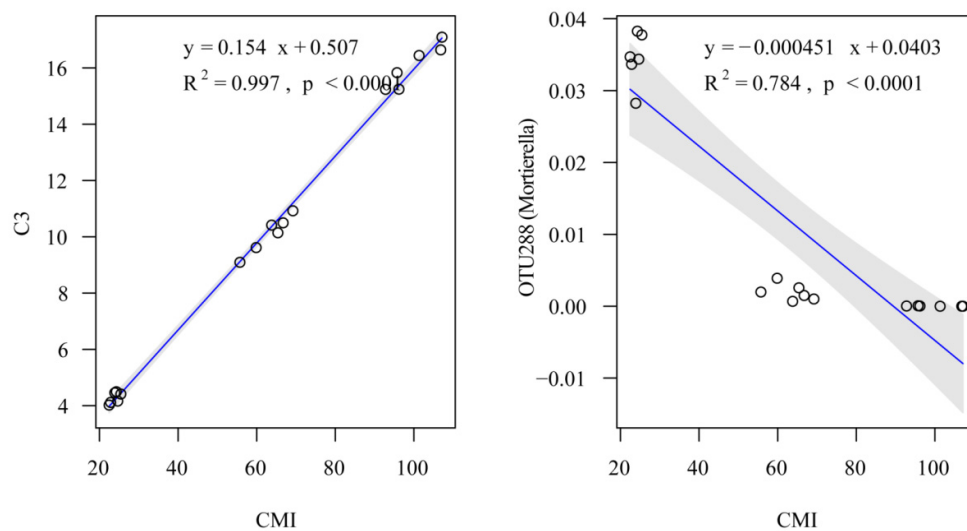

**Figure S3.** Relationships between carbon management index and its important predictors. CMI, Carbon Management Index; C3, less labile fraction of oxidizable carbon.

**Table S1.** Relative abundances of dominant genera in moso bamboo soils under different management practices.

| Phylum            | Genus                    | M0                  | M1                   | M2                   |
|-------------------|--------------------------|---------------------|----------------------|----------------------|
| Ascomycota        | <i>Archaeorhizomyces</i> | 6.10% $\pm$ 0.78% a | 3.38% $\pm$ 0.63% b  | 2.31% $\pm$ 0.96% c  |
|                   | <i>Trichoderma</i>       | 1.51% $\pm$ 0.28% c | 2.27% $\pm$ 0.65% b  | 3.11% $\pm$ 0.68% a  |
|                   | <i>Metarhizium</i>       | 1.42% $\pm$ 0.39% b | 2.14% $\pm$ 0.53% a  | 0.42% $\pm$ 0.25% c  |
|                   | <i>Cladophialophora</i>  | 0.77% $\pm$ 0.16% a | 0.66% $\pm$ 0.16% a  | 1.66% $\pm$ 1.99% a  |
| Basidiomycota     | <i>Saitozyma</i>         | 3.47% $\pm$ 0.72% b | 1.85% $\pm$ 0.51% b  | 40.04% $\pm$ 2.58% a |
|                   | <i>Russula</i>           | 6.69% $\pm$ 1.29% a | 0.00% $\pm$ 0.01% b  | 0.00% $\pm$ 0.00% b  |
| Mortierellomycota | <i>Mortierella</i>       | 4.75% $\pm$ 0.45% c | 12.37% $\pm$ 2.54% a | 9.36% $\pm$ 1.29% b  |

M0, M1, and M2 indicated undisturbed, extensively managed, and intensively managed bamboo stands, respectively.

Different lowercase letters within rows indicate significant difference at  $p \leq 0.05$  according to one-way ANOVA (LSD, n=6).

**Table S2.** Keystones identified in the soil microbial communities.

| Node    | Phylum            | Class              | Order           | Family              | Genus                   |
|---------|-------------------|--------------------|-----------------|---------------------|-------------------------|
| OTU46   | Ascomycota        | Dothideomycetes    | Pleosporales    | Cucurbitariaceae    | <i>Pyrenochaeta</i>     |
| OTU288  | Mortierellomycota | Mortierellomycetes | Mortierellales  | Mortierellaceae     | <i>Mortierella</i>      |
| OTU2877 | Basidiomycota     | Tremellomycetes    | Tremellales     | Trimorphomycetaceae | <i>Saitozyma</i>        |
| OTU2795 | Ascomycota        | Eurotiomycetes     | Chaetothyriales | Herpotrichiellaceae | <i>Cladophialophora</i> |
| OTU3158 | Mortierellomycota | Mortierellomycetes | Mortierellales  | Mortierellaceae     | <i>Mortierella</i>      |
